# Supplementary material
Source: MDPI journal article supplement (https://www.mdpi.com/2073-4441/12/2/473)
Supplement: s1 [file s1]

## SUPPLEMENTARY MATERIAL

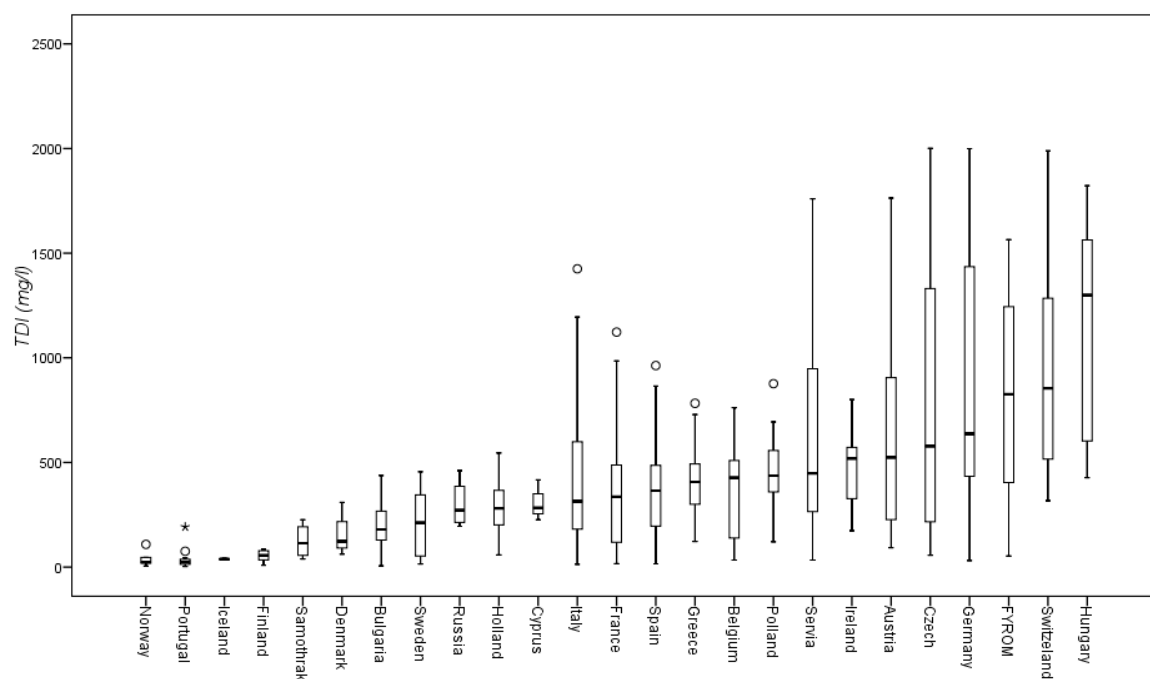

**Figure S1.** Box plots of TDI concentration (SiO<sub>2</sub> excluded) in bottled springs of 23 European countries and Samothraki springs. The box is the interquartile range and shows the middle 50% of the scores, the line that divides the box into two parts is the median value of each set of data and the dots are the outliers of the data sets. Number of samples for the datasets development per country: Switzerland: 25, Hungary: 6, Germany: 56, Sweden: 8, France: 35, Finland: 5, Denmark: 4, Czech: 13, Cyprus: 3, Bulgaria: 10, Belgium: 18, Austria: 16, Iceland: 4, FYROM: 8, Italy: 27, Greece: 67, Ireland: 11, Holland: 10, Norway: 5, Poland: 24, Portugal: 12, Russia: 4, Serbia: 7, Spain: 55, Samothraki: 19 (source: N. Skoulidakis, unpublished data).
